# Supplementary material
Source: MDPI journal article supplement (https://www.mdpi.com/2073-8994/14/5/981)
Supplement: s1 [file s1]

**Supplementary Table S1.** Multivariate regression using the asymmetric components of mandible shape onto the logarithm of the asymmetric centroid size (log CS) to assess allometry.

| Species                         | Pooled by sex |          | Pooled by fragment group (small and large) |          |
|---------------------------------|---------------|----------|--------------------------------------------|----------|
|                                 | Size Effect   |          | Size Effect                                |          |
| Rodentia                        | Predicted (%) | <i>p</i> | Predicted (%)                              | <i>p</i> |
| <i>Proechimys longicaudatus</i> | 2.33          | 0.17     | 2.33                                       | 0.17     |
| <i>Necromys lasiurus</i>        | 0.41          | 0.61     | 0.66                                       | 0.51     |
| Didelphimorphia                 |               |          |                                            |          |
| <i>Marmosa demerarae</i>        | 0.20          | 0.64     | 0.06                                       | 0.79     |
| <i>Monodelphis glirina</i>      | 0.00          | 0.99     | 0.04                                       | 0.84     |

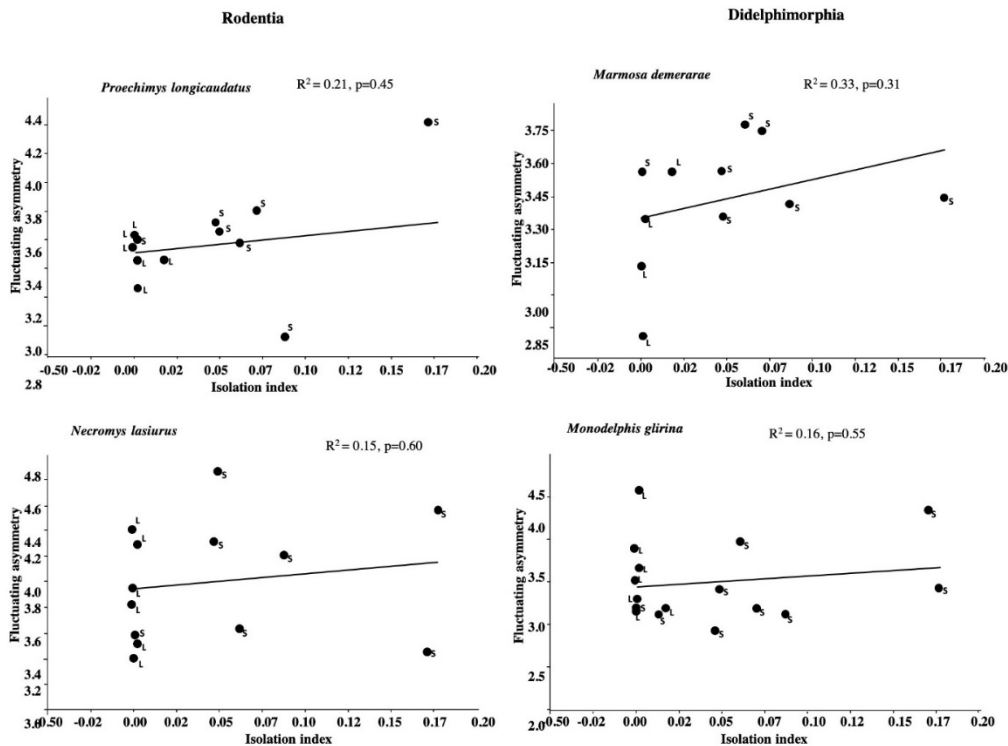

**Supplementary Figure S1.** Linear regression showing the influence of fragment isolation on fluctuating asymmetry levels in the mandible shape of south Amazonian small mammals (S=Small fragments, L=Large fragments).
